# Supplementary material for: Erlotinib Plus Bevacizumab Phase ll Study in Patients with Advanced Non-small-Cell Lung Cancer (JO25567): Updated Safety Results
Source: PubMed Central journal article supplement — Drug Saf. 2017 Oct 17;41(2):229–37. doi: 10.1007/s40264-017-0596-0 (PMC5808045; doi:10.1007/s40264-017-0596-0), 2017-10-17
Supplement: 40264_2017_596_MOESM1_ESM.pdf [file 40264_2017_596_MOESM1_ESM.pdf]

Updated safety of erlotinib+bevacizumab in NSCLC: JO25567

## **Electronic Supplementary Material**

### **Erlotinib Plus Bevacizumab Phase II Study in Patients with Advanced Non-Small-Cell Lung Cancer (JO25567): Updated Safety Results**

**Target journal:** Drug Safety

Terufumi Kato<sup>1</sup> · Takashi Seto<sup>2</sup> · Makoto Nishio<sup>3</sup> · Koichi Goto<sup>4</sup> · Noboru Yamamoto<sup>5</sup> · Isamu Okamoto<sup>6</sup> · Liang Tao<sup>7</sup> · Wei Yu<sup>8</sup> · Tarik Khaznadar<sup>9</sup> · Kosei Tajima<sup>10</sup> · Masahiko Shibata<sup>10</sup> · Akihiro Seki<sup>10</sup> · Nobuyuki Yamamoto<sup>11</sup>

<sup>1</sup>*Kanagawa Cancer Center, 2-3-2 Nakao, Asahi-ku, Yokohama, Kanagawa 241-8515, Japan.*

<sup>2</sup>*National Kyushu Cancer Center, Fukuoka, Japan.*

<sup>3</sup>*The Cancer Institute Hospital of the Japanese Foundation for Cancer Research, Tokyo, Japan.*

<sup>4</sup>*National Cancer Center Hospital East, Chiba, Japan.*

<sup>5</sup>*National Cancer Center Hospital, Tokyo, Japan.*

<sup>6</sup>*Research Institute for Diseases of the Chest, Graduate School of Medical Sciences, Kyushu University, Fukuoka, Japan.*

<sup>7</sup>*Roche (China) Holding Ltd, Building 11, 1100 Longdong Avenue, Shanghai 201203, China.*

<sup>8</sup>*Genentech Inc., 1 DNA Way, South San Francisco, CA 94080, USA.*

<sup>9</sup>*F. Hoffmann-La Roche Ltd, Grenzacherstrasse 124, Basel, CH-4070 Switzerland.*

<sup>10</sup>*Chugai Pharmaceutical Co. Ltd, Tokyo, Japan.*

<sup>11</sup>*Wakayama Medical University, Wakayama, Japan.*

#### **Corresponding author:**

Terufumi Kato, Department of Respiratory Medicine, Kanagawa Cancer Center, 2-3-2 Nakao, Asahi-ku, Yokohama, Kanagawa 241-8515, Yokohama, Japan.

Email: [terufumikato@gmail.com](mailto:terufumikato@gmail.com)

**Supplementary Table S1.** Criteria for interruption of administration, drug discontinuation, dose reduction, and discontinuation of administration of bevacizumab or erlotinib in JO25567

| Adverse event                              |                        | JO25567                                                                                                                                  |
|--------------------------------------------|------------------------|------------------------------------------------------------------------------------------------------------------------------------------|
| Hypertension                               | Grade 3                | Defer bevacizumab until controlled (use of anti-hypertensives possible).                                                                 |
|                                            | Grade 3                | Continue erlotinib but can be withdrawn until recovery to grade $\leq 1$ according to investigator judgement.                            |
| Proteinuria                                | Grade 2                | If decreased albumin or edema is seen, defer administration until recovery to $\leq$ grade 2. Continue if protein:urine $\leq 2$ g/24hr. |
|                                            | Grade 3                | Defer bevacizumab; restart if recovery to $\leq$ grade 2 and decreased albumin or edema is not seen or protein:urine $\leq 2$ g/24hr.    |
|                                            | Grade 3                | Withdraw erlotinib until $\leq$ grade 2, then restart at the same dose; dose reduction is also possible.                                 |
| Hemorrhage<br>(excluding<br>hemoptysis)    | Grade 2                | Defer until recovers to grade 0. If hemorrhage $\geq$ grade 2 after a restart, discontinue bevacizumab.                                  |
|                                            | Grade 3                | Discontinue bevacizumab.                                                                                                                 |
|                                            | Grade 3                | Erlotinib withdrawal until recovery to $\leq$ grade 1.                                                                                   |
| Hemoptysis<br>(including bloody<br>sputum) | Grade 1 and<br>Grade 2 | Grade 1 and 2 that require treatment with an oral hemostatic; defer until grade 0.                                                       |
|                                            | Grade 2 and<br>Grade 3 | Grade 2 and 3 that require treatment with an injectable hemostatic; discontinue bevacizumab.                                             |
|                                            | Grade 3                | Erlotinib withdrawal until recovery to $\leq$ grade 1.                                                                                   |
